# Supplementary material for: One-pot synthesis of core@shell PdAuPt nanodendrite@Pd nanosheets for boosted visible light-driven methanol electrooxidation
Source: Royal Society of Chemistry journal article supplement (doi:10.1039/d1cc06059g), 2021-01-01
Supplement: d1cc06059g1.pdf [file d1cc06059g1.pdf]

# One-Pot Synthesis of Surfactant-Free Core@Shell PdAuPt Nanodendrites@Pd Nanosheets for Boosted Visible Light Driven Methanol Electrooxidation

Fei Gao, Yangping Zhang, Huaming You, Zhuolin Li, Bin Zou, Yukou Du\*

*College of Chemistry, Chemical Engineering and Materials Science, Soochow University,  
Industrial Park, Renai Road, Suzhou 215123, PR China*

\* Corresponding author: E-mail: [duyk@suda.edu.cn](mailto:duyk@suda.edu.cn) (Y. Du).

## 1. Experimental section

*Materials and chemicals:* Palladium acetate ( $\text{Pd}(\text{OAc})_2$ , 98%), Tungsten carbonyl ( $\text{W}(\text{CO})_6$ , 97%), Chloroauric acid tetrahydrate ( $\text{HAuCl}_4 \cdot 4\text{H}_2\text{O}$ , A.R. grade, 99%), and Chloroplatinic acid hexahydrate ( $\text{H}_2\text{PtCl}_6 \cdot 6\text{H}_2\text{O}$ , 99%) came from Shanghai Macklin Co. Ltd. N, N-Dimethylformamide (DMF, >99.5%), Acetic acid (AA, 99%). Methanol ( $\text{CH}_3\text{OH}$ , AR grade, 99.9%), and ethanol ( $\text{CH}_3\text{CH}_2\text{OH}$ , AR grade, 99.7%) were from Sinopharm Chemical Reagent Co. Ltd., Water ( $\text{H}_2\text{O}$ , 18  $\text{M}\Omega/\text{cm}$ ) used in tests was prepared through flowing through an ultra-pure purification system.

*Preparation of PdPtAu@Pd core@shell Catalysts:* In a preparation of PdPtAu@Pd catalysts, 10 mg of  $\text{Pd}(\text{OAc})_2$ , 1.6 mg of  $\text{HAuCl}_4 \cdot 4\text{H}_2\text{O}$ , 2.0 mg  $\text{H}_2\text{PtCl}_6 \cdot 6\text{H}_2\text{O}$ , 30 mg of  $\text{W}(\text{CO})_6$ , 2 mL acetic acid were added in a vial containing 8 mL DMF in sequence. The precursor compound was mixed and dissolved fully under ultrasonication. Afterwards, the vial was removed to an oil bath and heated up to 140 °C for 60 min. After cooling down to room temperature, the final products were denoted as PdPtAu@Pd catalysts, and collected by centrifugating and washing with the ethanol solution for several times.

*Characterizations:* The structure characterizations of the obtained products were firstly conducted by transmission electron microscope (TEM, accelerating voltage: 120 kV, HT-7700) and high resolution TEM (HRTEM, operation voltage: 200 kV, F20). The phase structure was investigated by X-ray diffraction (XRD) spectra recorded on a X'Pert-Pro MPD diffractometer (Netherlands PANalytical) operating at 40 kV with Cu K $\alpha$  radiation. The elemental composition and chemical states of the sample were analyzed by scanning electron microscope energy-dispersive X-ray spectroscopy (SEM-EDS, working voltage: 15 kV) and X-ray photoelectron spectroscopy (XPS) that conducted on a VG Scientific ESCALab 220 XL electron spectrometer with 300 W Al K $\alpha$  radiation, respectively.

*Electrochemical measurements:* The electrochemical tests were performed on an Electrochemical Work Station (CHI660E Shanghai Chenhua Instrument Corporation, China) with a three-electrode electrochemical cell including the working electrode (glassy carbon electrode, GCE, diameter: 3 mm), the counter electrode (platinum wire), and the reference electrode (KCL saturated calomel electrode, SCE). The calibration technique was also adopted to ensure the stability of reference electrode.<sup>[60]</sup> The obtained catalysts were dispersed in a mixture containing isopropanol and Nafion (5%) to form a 0.40 mg<sub>metal</sub>/mL dispersion. Subsequently, 5  $\mu$ L catalytic ink was deposited on a GCE and dried naturally to fabricate the catalyst-coated working electrode. MOR measurements were conducted in 0.5 M KOH + 1 M methanol solution. In addition, a 150 W power xenon lamp with UV cut-off filter (> 400 nm) was applied to supply visible light.

## 2. Supporting figures and tables

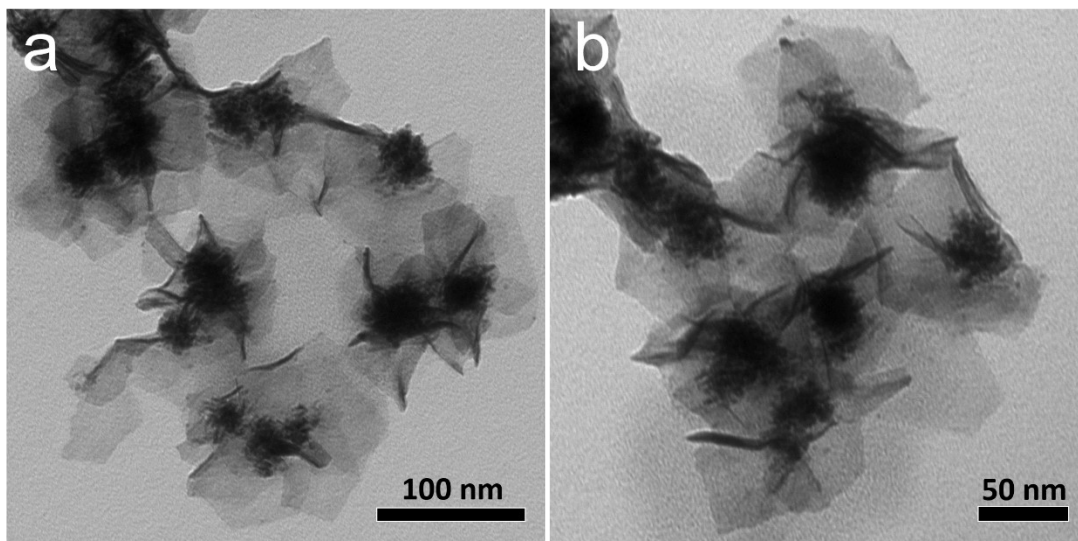

**Figure. S1** Additional TEM images of PdPtAu@Pd core@shell nanocatalysts.

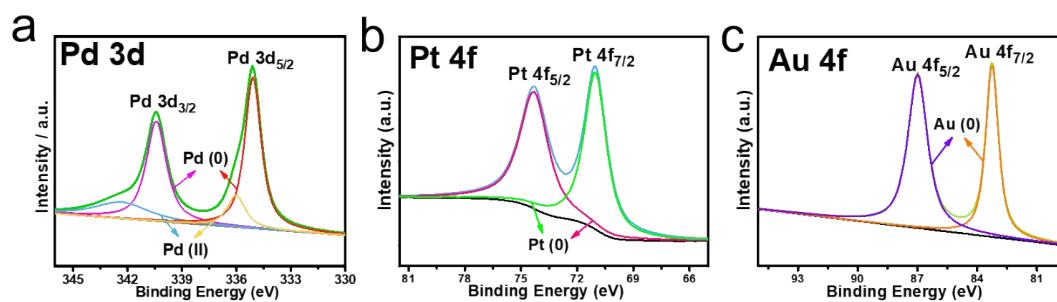

**Figure. S2** XPS spectra of (a) Pd 3d, and (b) Pt 4f, and (c) Au 4f in PdPtAu@Pd core@shell nanocatalysts.

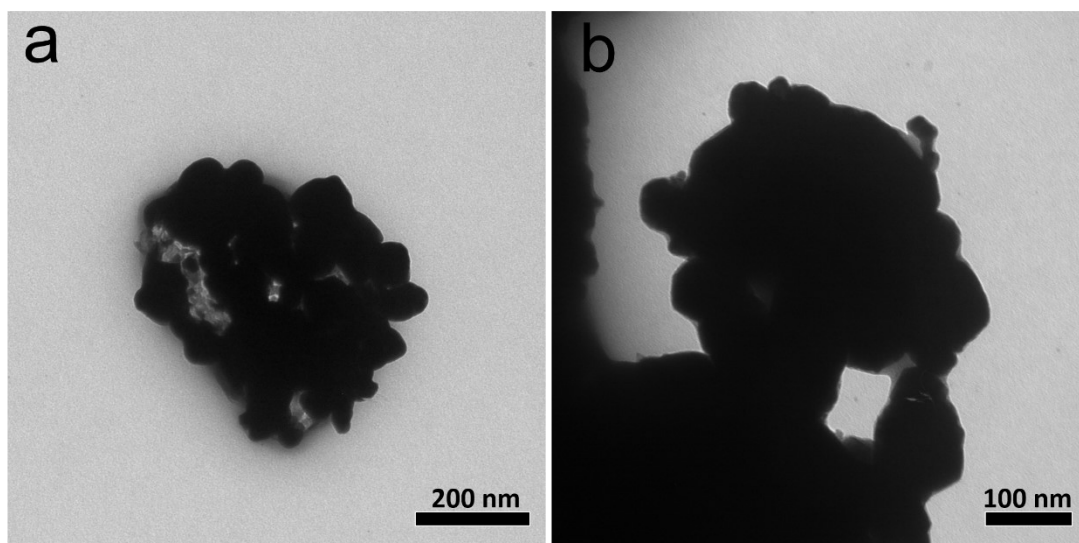

**Figure. S3** (a and b) TEM images of the products with the same reaction conditions as that of PdPtAu@Pd without the addition of  $W(CO)_6$ .

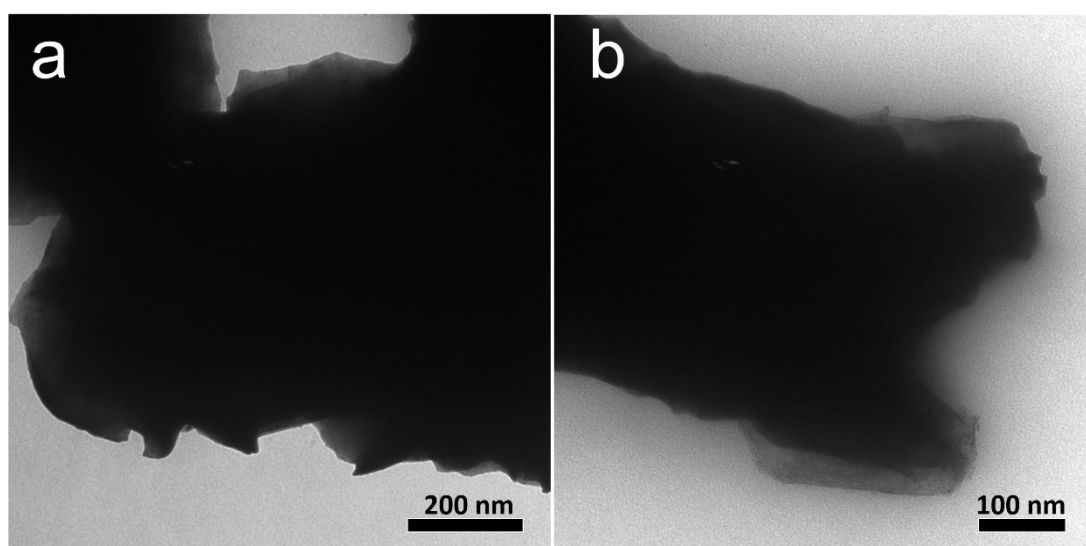

**Figure. S4** (a and b) TEM images of the products with the same reaction conditions as that of PdPtAu@Pd without the addition of AA.

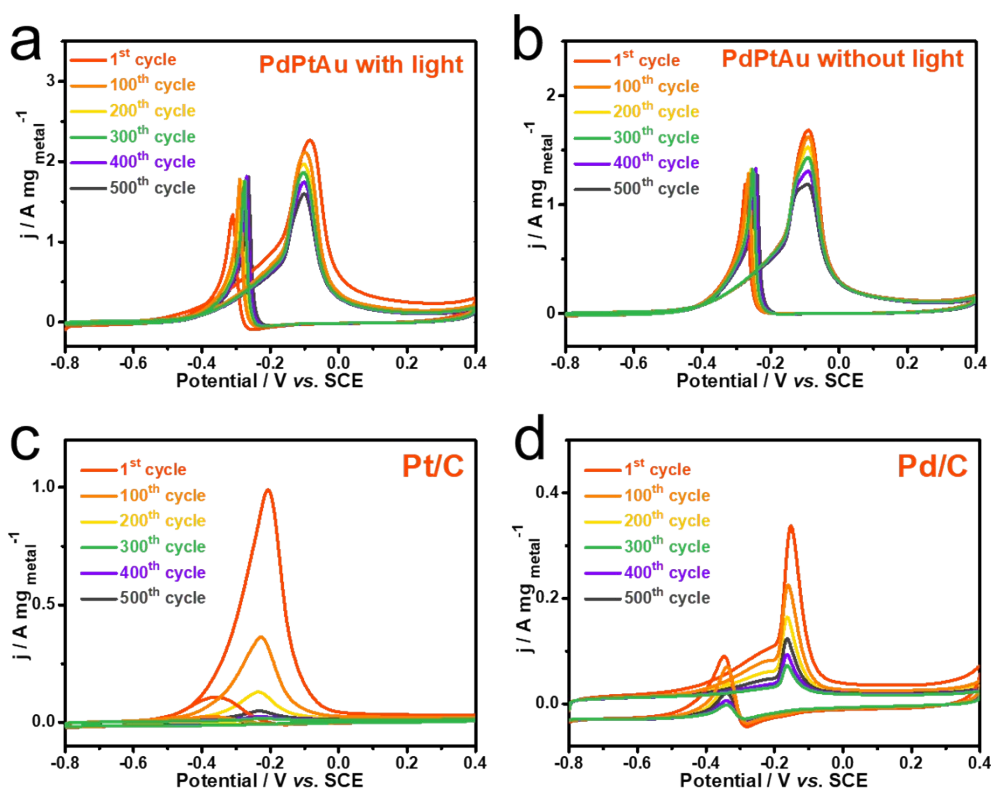

**Figure. S5** CV (1<sup>st</sup>, 100<sup>th</sup>, 200<sup>th</sup>, 300<sup>th</sup>, 400<sup>th</sup> and 500<sup>th</sup>) curves of (a) PdPtAu@Pd with light, (b) PdPtAu@Pd without light, (c) Pt/C, and (d) Pd/C catalysts recorded in 0.5 M KOH + 1 M methanol solution.

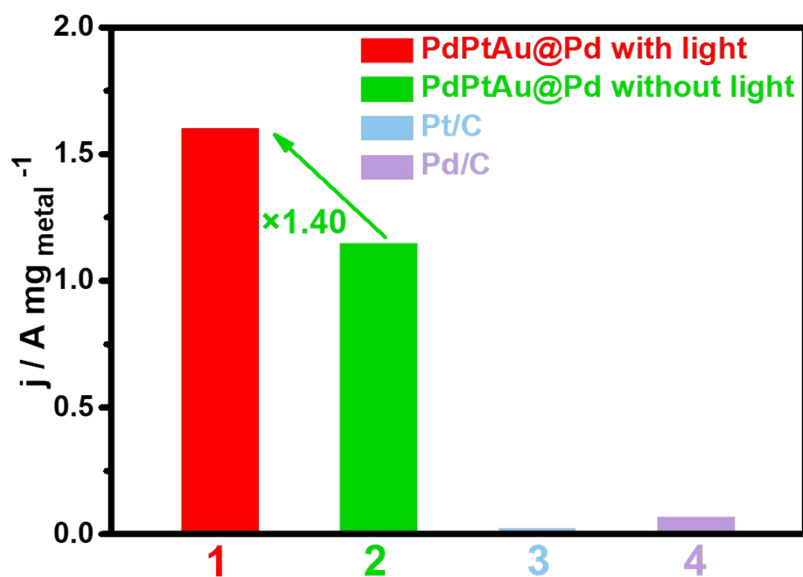

**Figure. S6** Retained mass activities of the tested catalysts after consecutive CV tests for MOR.

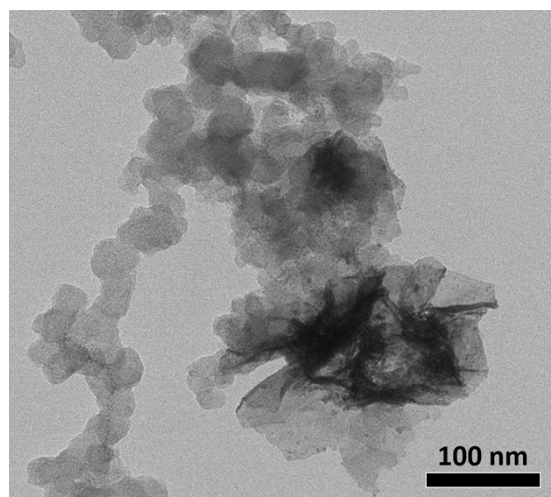

**Figure. S7** TEM images of PdPtAu@Pd core@shell catalysts after 500 CV cycles.

**Table S1.** MOR performances of PdPtAu@Pd core@shell catalysts and various electrocatalysts from published works.

| Catalysts                                          | Peak currents<br>from CV curves | Electrolyte                 | Reference                                                  |
|----------------------------------------------------|---------------------------------|-----------------------------|------------------------------------------------------------|
|                                                    | $J_m$ (A mg <sup>-1</sup> )     |                             |                                                            |
| PdPtAu@Pd                                          | 2.266                           | 0.5 M KOH + 1 M methanol    | This work                                                  |
| Pd <sub>4</sub> Sn<br>WNWs                         | 1.04                            | 0.1 M KOH + 0.5M methanol   | <i>Nano Lett.</i> <b>2019</b> , 19, 6894–6903              |
| Pd-PdO<br>PNTs                                     | 1.11                            | 0.1 M KOH + 0.3 M methanol  | <i>Adv. Funct. Mater.</i> <b>2020</b> , 30, 2000534.       |
| Pd <sub>72</sub> Cu <sub>14</sub> Co <sub>14</sub> | 1.062                           | 1 M KOH + 1 M methanol      | <i>Energy Chem.</i> 2019, <b>29</b> , 72.                  |
| PdCo                                               | 1.08                            | 1 M KOH + 1 M methanol      | <i>ACS Appl. Mater. Interfaces</i> <b>2018</b> , 10, 29965 |
| PdAg@Pd                                            | 0.69                            | 0.5 M NaOH + 0.5 M methanol | <i>J. Power Sources</i> <b>2018</b> , 398, 201.            |
| PdAuCu                                             | 1.046                           | 1 M KOH + 1 M methanol      | <i>Electrochim. Acta.</i> <b>2017</b> , 227, 330           |
| Pd <sub>2</sub> Cu <sub>2</sub>                    | 0.916                           | 1 M KOH + 1 M methanol      | <i>J. Mater. Sci.</i> <b>2018</b> , 53, 15871.             |
| Pd <sub>0.52</sub> Ag                              | 0.72                            | 0.5 M NaOH + 1 M methanol   | <i>Angew. Chem., Int. Ed.</i> <b>2019</b> , 58, 8794       |

### 3. MOR pathway mechanism

The MOR pathway could be explained by the following equations. Generally, the methanol electrooxidation is a slow kinetic process with 6e<sup>-</sup> transfer, including the absorption, dehydrogenation, and oxidation process, which could be illustrated in the following equations [1-3].

6e<sup>-</sup> pathway mechanism:

i) absorption process:

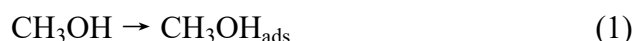

ii) dehydrogenation process:

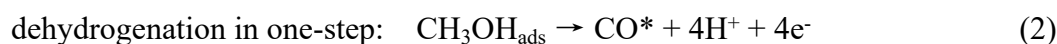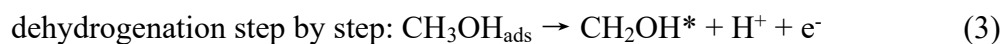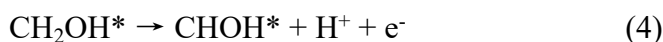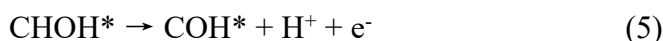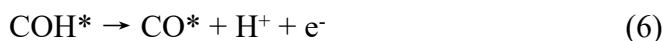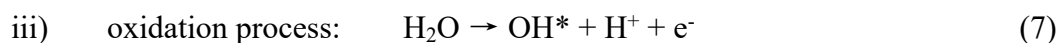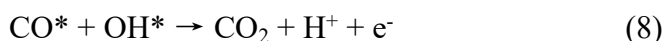

As illustrated in the elementary reactions, the methanol molecule firstly absorbed on the surfaces of catalysts to form the  $\text{CH}_3\text{OH}_{\text{ads}}$  species (equation (1)), and then dehydrogenated and decomposed to form carbon intermediate species  $\text{CO}^*$ , the  $\text{CO}$  species could be gradually dehydrogenated by  $\text{CH}_2\text{OH}^*$ ,  $\text{CHOH}^*$ ,  $\text{COH}^*$  (equation (2-6)). In alkaline media, the MOR mechanism went through two possible pathways. However, the  $\text{CO}^*$  could combine with  $\text{OH}^-$  to form the  $\text{OH}^*$  in alkaline conditions, thus to form the ultima  $\text{CO}_2$  products.

#### References

- 1 H. Meng, Y. Zhan, D. Zeng, X. Zhang, G. Zhang, F. Jaouen, *Small*, 2015, 11, 3377-3386.
- 2 Y. Xu, B. Zhang, *Chem. Soc. Rev.* 2014, 43, 2439-2450.
- 3 N. Kakati, J. Maiti, S.H. Lee, S.H. Jee, B. Viswanathan, Y.S. Yoon, *Chem. Rev.* 2014, 114, 12397-12429.
